# Supplementary material for: GATA4/FOG2 transcriptional complex regulates Lhx9 gene expression in murine heart development
Source: PubMed Central journal article supplement (PMC2447832; doi:10.1186/1471-213x-8-67), 2008-06-24
Supplement: 1471-213X-8-67-S1.pdf [file 1471-213X-8-67-S1.pdf]

**Supplemental Table 1.**  
**Differentially Expressed Genes in E13.5 Control vs. *Fog2*<sup>-/-</sup> hearts**  
**(cut-off point ~2.5 fold)**

| Gene order                 | Affymetrix Probe  | Fold Change   | Sequence Accession Number | Gene Symbol   | Gene Name                                                                                |
|----------------------------|-------------------|---------------|---------------------------|---------------|------------------------------------------------------------------------------------------|
| <b>Downregulated genes</b> |                   |               |                           |               |                                                                                          |
| 1.                         | 1419606_a_at      | <b>-4,21</b>  | NM_011618.1               | Tnnt1         | troponin T1                                                                              |
| 2.                         | 1451203_at        | <b>-4,03</b>  | BC025172.1                | Mb            | myoglobin                                                                                |
| 3.                         | 1448545_at        | <b>-3,88</b>  | AU021035                  | Sdc2          | syndecan 2                                                                               |
| 4.                         | 1433184_at        | <b>-3,22</b>  | AK020162.1                | Cacna1c       | calcium channel, voltage-dependent, L type, alpha 1C subunit                             |
| 5.                         | 1417023_a_at      | <b>-3,53</b>  | NM_024406.1               | Fabp4         | fatty acid binding protein 4                                                             |
| 6.                         | 1419012_at        | <b>-3,24*</b> | AF107306.1                | Zfpm2         | Zinc finger protein, multitype 2                                                         |
| 7.                         | 1438072_at        | <b>-2,7</b>   | BB242844                  | Nfib          | nuclear factor I/B                                                                       |
| 8.                         | 1447231_at        | <b>-2,68</b>  | BM123508                  | Slc8a1        | solute carrier family 8 (sodium/calcium exchanger)                                       |
| 9.                         | 1441624_at        | <b>-2,66</b>  | BB479893                  | Sorbs2        | sorbin and SH3 domain containing 2                                                       |
| 10.                        | 1446921_at        | <b>-2,66</b>  | BM204670                  | Grb10         | growth factor receptor bound protein 10                                                  |
| 11.                        | 1458081_at        | <b>-2,59</b>  | BB477614                  | NA            | hypothetical protein                                                                     |
| 12.                        | 1457797_at        | <b>-2,52</b>  | AV340788                  | Slc8a1        | solute carrier family 8 (sodium/calcium exchanger), member 1                             |
| 13.                        | 1417614_at        | <b>-2,44</b>  | NM_007710.1               | Ckm           | creatine kinase, muscle                                                                  |
| 14.                        | 1438651_a_at      | <b>-2,41</b>  | BB483357                  | Agtrl1        | angiotensin receptor-like 1                                                              |
| 15.                        | 1438878_at        | <b>-2,41</b>  | AU067682                  | 6430537K16Rik | 6430537K16Rik                                                                            |
| <b>Upregulated genes</b>   |                   |               |                           |               |                                                                                          |
| 1.                         | 1416645_a_at      | <b>10.08</b>  | NM_007423.1               | Afp           | alpha fetoprotein                                                                        |
| 2.                         | 1454866_s_at      | <b>7.71</b>   | BQ176424                  | Clic6         | chloride intracellular channel 6                                                         |
| 3.                         | 1427119_at        | <b>4.39</b>   | AV066321                  | Spink4        | serine protease inhibitor, Kazal type 4                                                  |
| 4.                         | 1427126_at        | <b>3.36</b>   | M12573.1                  | Hspa1b        | heat shock protein 1B                                                                    |
| 5.                         | 1448949_at        | <b>3.27</b>   | NM_007607.1               | Car4          | carbonic anhydrase 4                                                                     |
| 6.                         | 1416103_at        | <b>3.16</b>   | BF608615                  | Ywhaz         | tyrosine 3-monooxygenase/tryptophan 5-monooxygenase activation protein, zeta polypeptide |
| 7.                         | <b>1419324_at</b> | <b>3.15</b>   | <b>NM_010714.1</b>        | <b>Lhx9</b>   | <b>LIM homeobox protein 9</b>                                                            |
| 8.                         | 1423691_x_at      | <b>3.12</b>   | M21836.1                  | Krt2-8        | keratin complex 2, basic, gene 8                                                         |
| 9.                         | 1436043_at        | <b>3.07</b>   | BB508825                  | Scn7a         | sodium channel, voltage-gated, type VI, alpha polypeptide                                |
| 10.                        | 1452388_at        | <b>3.05</b>   | AW763765                  | Hspa1a        | heat shock protein 1A                                                                    |
| 11.                        | 1433930_at        | <b>3.02</b>   | BG094050                  | Hpse          | heparanase                                                                               |
| 12.                        | 1439622_at        | <b>2.88</b>   | AV291679                  | Rassf4        | Ras association (RalGDS/AF-6) domain family 4                                            |
| 13.                        | 1418934_at        | <b>2.85</b>   | NM_011839.1               | Mab21l2       | mab-21-like 2 ( <i>C. elegans</i> )                                                      |
| 14.                        | 1448756_at        | <b>2.69</b>   | NM_009114.1               | S100a9        | S100 calcium binding protein A9 (calgranulin B)                                          |
| 15.                        | 1435761_at        | <b>2.68</b>   | AW146083                  | Stfal1        | stefin A1                                                                                |
| 16.                        | 1428547_at        | <b>2.57</b>   | AV273591                  | Nt5e          | 5' nucleotidase, ecto                                                                    |
| 17.                        | 1416468_at        | <b>2.56</b>   | NM_013467.1               | Aldh1a1       | aldehyde dehydrogenase family 1, subfamily A1                                            |
| 18.                        | 1430700_a_at      | <b>2.55</b>   | AK005158.1                | Pla2g7        | phospholipase A2, group VII (platelet-activating factor acetylhydrolase, plasma)         |
| 19.                        | 1448169_at        | <b>2.53</b>   | NM_010664.1               | Krt1-18       | keratin complex 1, acidic, gene 18                                                       |

\* Calculated by the Gene traffic program using the combined value for **both** tags corresponding to *Zfpm2* (*Fog2*). The call value for the tag corresponding to the deleted region (encoding zinc finger regions; Tevosian et al., 2000) of *Zfpm2* (*Fog2*) is absent (A) in the *Fog2*<sup>-/-</sup> sample.
