# Supplementary material for: GATA4/FOG2 transcriptional complex regulates Lhx9 gene expression in murine heart development
Source: PubMed Central journal article supplement (PMC2447832; doi:10.1186/1471-213x-8-67), 2008-06-24

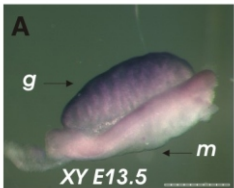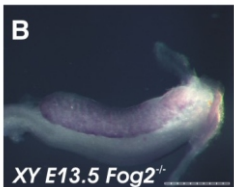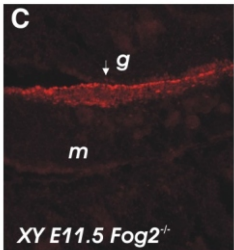

Supplement: 1471-213X-8-67-S2.pdf [file 1471-213X-8-67-S2.pdf]
