# Supplementary material for: GATA4/FOG2 transcriptional complex regulates Lhx9 gene expression in murine heart development
Source: PubMed Central journal article supplement (PMC2447832; doi:10.1186/1471-213x-8-67), 2008-06-24
Supplement: 1471-213X-8-67-S3.pdf [file 1471-213X-8-67-S3.pdf]

A.

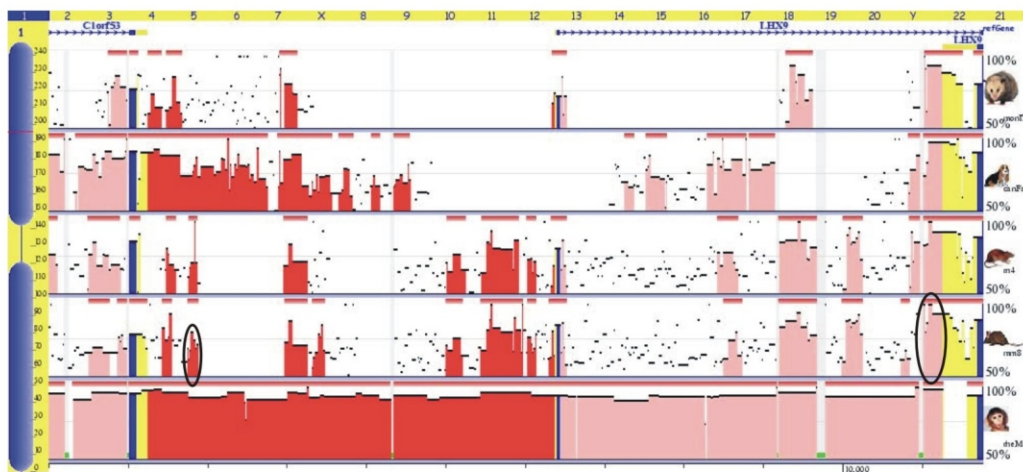

<http://ecrbrowser.dcode.org/browser.php?jID=18581160&location=chr1:196143837-196151677&action=Out1.5x>

B.

*Lhx9* +2xAGATAG

**AGGTAC**TATCTGCTGGCCGTAGACAAACAGTGGCATCTTAGGTGCCTGAA  
GTGCTGTGAATGTAAGCTGGCTCTGGAATCTGAGCTCACCTGCTTTGCCA  
AGGACGGTAGCATTTACTGCAAGGAGGATTATTACAGTACTGCCCCCACC  
CCCAGCCCCTTACACACTCCTCTGACCCAATTCACCA**GATA**GAACT  
CGGATAGAGCCACTGCGAGA**AATCCGGAGTCCCTTCTCTGTCCCTT**
